# Supplementary material for: Freezing Storage Prior to Processing Preserves Flavor and Nutritional Quality of Vacuum-Packed Sweet Corn
Source: Research Square preprint supplement (doi:10.21203/rs.3.rs-8853808/v1), 2026-02-20
Supplement: Supplementary file 2 [file f65d68235bd822512172784a.docx]

**Supplementary Material Tables S1-6**

**Supplementary Table S1.** Identification of volatile components in **vacuum-packed sweet corn** (VPSC) by GC-IMS.

| **Serial number** | **Compounds** | **CAS#** | **Formula** | **Molecular**  **weight** | **RI** | **Rt**  **[sec]** | **Dt**  **[a.u.]** | **Odor description** |
| --- | --- | --- | --- | --- | --- | --- | --- | --- |
| 1 | cyclohexanone（dimer） | C108941 | C6H10O | 98.1 | 1333 | 689.269 | 1.16091 | Mint, Cool |
| 2 | ethyl crotonate | C623701 | C6H10O2 | 114.1 | 1159.2 | 333.105 | 1.55655 | Tropical Fruit |
| 3 | 1-Penten-3-ol | C616251 | C5H10O | 86.1 | 1158.4 | 332.082 | 1.3608 | mushroom，Green |
| 4 | Borneol | C507700 | C10H18O | 154.3 | 1186.8 | 369.93 | 1.215 | camphoraceous，dry |
| 5 | 6-methylhept-5-en-2-one | C110930 | C8H14O | 126.2 | 1345.5 | 729.136 | 1.17728 | Citrus, Mushroom, Pepper, Rubber, Strawberry |
| 6 | Ethyl benzoate | C93890 | C9H10O2 | 150.2 | 1158.1 | 331.766 | 1.26413 | Camomile, Celery, Fat, Flower, Fruit |
| 7 | 3-Octanol | C589980 | C8H18O | 130.2 | 992.9 | 196.969 | 1.40345 | Citrus, Moss, Mushroom, Nut, Oil |
| 8 | Methyl acetate | C79209 | C3H6O2 | 74.1 | 852.7 | 147.132 | 1.19197 | ether,sweet,fruity |
| 9 | Methyl phenylacetate | C101417 | C9H10O2 | 150.2 | 1116.5 | 285.803 | 1.25736 | Honey, Jasmine |
| 10 | cyclohexanone（dimer） | C108941 | C6H10O | 98.1 | 906.6 | 162.023 | 1.15588 | Mint, Cool |
| 11 | 2-pentanol | C6032297 | C5H12O | 88.1 | 1118.6 | 287.942 | 1.19556 | Fusel Oil, Green |
| 12 | *γ*-Butyrolactone | C96480 | C4H6O2 | 86.1 | 924.6 | 168.016 | 1.08695 | caramel, sweet |
| 13 | Naphthalene（dimer） | C91203 | C10H8 | 128.2 | 1185.8 | 368.517 | 1.13195 | camphoric，greasy，oily |
| 14 | Naphthalene（dimer） | C91203 | C10H8 | 128.2 | 1219.7 | 421.703 | 1.12912 | camphoric，greasy，oily |
| 15 | Thymol methyl ether | C1076568 | C11H16O | 164.2 | 1267.5 | 515.351 | 1.24204 | Floral |
| 16 | hexyl acetate | C142927 | C8H16O2 | 144.2 | 1265.1 | 510.018 | 1.41165 | Apple, Banana, Grass, Herb, Pear |
| 17 | 1-Hexanol | C111273 | C6H14O | 102.2 | 1324 | 661.825 | 1.32917 | Banana, Flower, Grass, Herb |
| 18 | Butanol(dimer) | C71363 | C4H10O | 74.1 | 1171.3 | 348.671 | 1.36329 | floral，fragrant，fruity，sweet |
| 19 | Butanol(dimer) | C71363 | C4H10O | 74.1 | 1171.3 | 348.671 | 1.18091 | floral，fragrant，fruity，sweet |
| 20 | (E)-2-hexenal | C6728263 | C6H10O | 98.1 | 1215.3 | 414.213 | 1.18255 | bitter almond-like、apple, fresh |
| 21 | 2-Methoxyphenyl acetate | C613707 | C9H10O3 | 166.2 | 1303.4 | 603.109 | 1.25449 | Floral |
| 22 | Camphene | C79925 | C10H16 | 136.2 | 943.9 | 175.153 | 1.20012 | woody, fir needle, cooling, minty |
| 23 | linalyl acetate(dimer) | C115957 | C12H20O2 | 196.3 | 1246.7 | 471.54 | 1.69393 | Fruit |
| 24 | linalyl acetate(dimer) | C115957 | C12H20O2 | 196.3 | 1247.1 | 472.354 | 1.64973 | Fruit |
| 25 | 3-nonanone | C925780 | C9H18O | 142.2 | 1339.2 | 708.69 | 1.37844 | Floral |
| 26 | Benzyl alcohol | C100516 | C7H8O | 108.1 | 1036.2 | 221.64 | 1.17039 | floral |
| 27 | Cyclopentanone | C120923 | C5H8O | 84.1 | 1204 | 395.948 | 1.10677 | Mint, Cool |
| 28 | *p*-Cymene | C99876 | C10H14 | 134.2 | 1267.6 | 515.516 | 1.30997 | spice, terpene |
| 29 | 2,5-dimethylpyrazine | C123320 | C6H8N2 | 108.1 | 1330.5 | 681.47 | 1.10332 | roasty,flowery,coca |
| 30 | (Z)-3-octen-1-ol(dimer) | C20125842 | C8H16O | 128.2 | 1063.7 | 240.567 | 1.35506 | Dust, Toasted Nut |
| 31 | (Z)-3-octen-1-ol(dimer) | C20125842 | C8H16O | 128.2 | 1064.4 | 241.132 | 1.30537 | Dust, Toasted Nut |
| 32 | 2-Acetyl-1-pyrroline | C85213225 | C6H9NO | 111.1 | 1311.9 | 626.587 | 1.12845 | Popcorn |
| 33 | 2-acetylfuran | C1192627 | C6H6O2 | 110.1 | 891.9 | 157.533 | 1.11639 | sweet ,coffee |
| 34 | (E)-2-decenal | C3913813 | C10H18O | 154.3 | 1267 | 514.151 | 1.48202 | milk-fatty |
| 35 | Cumin aldehyde | C122032 | C10H12O | 148.2 | 1247.9 | 473.932 | 1.33228 | Acid, Green, Herb, Sharp |
| 36 | 2,6-Dimethylphenol | C576261 | C8H10O | 122.2 | 1096.7 | 267.329 | 1.13833 | Cresol, Phenol |
| 37 | Syringol | C91101 | C8H10O3 | 154.2 | 1356.4 | 765.837 | 1.32991 | Phenol |
| 38 | 2-phenyl-2-butenal | C4411896 | C10H10O | 146.2 | 1282.3 | 549.444 | 1.24996 | Cocoa, Roast, Rum |
| 39 | 2-methyl-3-furanthiol | C28588741 | C5H6OS | 114.2 | 1293.4 | 576.873 | 1.13927 | Fried, Nut, Potato, Roasted Meat |
| 40 | 3-Methyl-2-butenal | C107868 | C5H8O | 84.1 | 779.8 | 132.798 | 1.08809 | Almond, Roasted |
| 41 | Methyl anthranylate | C134203 | C8H9NO2 | 151.2 | 1338.5 | 706.568 | 1.25719 | Floral, Must |
| 42 | 1-Hydroxy-2-propanone | C116096 | C3H6O2 | 74.1 | 1323.2 | 659.25 | 1.2337 | Butter, Herb, Malt, Pungent |
| 43 | acetic acid(dimer) | C64197 | C2H4O2 | 60.1 | 1423.3 | 1035.788 | 1.15672 | vinegar-like |
| 44 | acetic acid(dimer) | C64197 | C2H4O2 | 60.1 | 1447.1 | 1153.651 | 1.15066 | Acid, Fruit, Pungent, Sour, Vinegar |
| 45 | oct-1-en-3-ol | C3391864 | C8H16O | 128.2 | 1469.8 | 1278.174 | 1.16008 | Cucumber, Earth, Fat, Floral, Mushroom |
| 46 | trimethylpyrazine | C14667551 | C7H10N2 | 122.2 | 1403.5 | 947.573 | 1.1595 | roasted, potato, musty |
| 47 | 3-Hydroxy-2-butanone | C513860 | C4H8O2 | 88.1 | 1305.5 | 608.986 | 1.3255 | Butter, Creamy, Green Pepper |
| 48 | octan-2-one | C111137 | C8H16O | 128.2 | 964.1 | 183.472 | 1.33254 | Fat, Fragrant, Mold |
| 49 | Myrcene | C123353 | C10H16 | 136.2 | 974 | 187.884 | 1.28922 | ethereal，resinous，soapy，spicy |
| 50 | 2-Pentylfuran | C3777693 | C9H14O | 138.2 | 984.3 | 192.715 | 1.24466 | buttery,caramel/metallic, fishhy,roasted,popcorn |
| 51 | 2-ethylpyrazine | C13925003 | C6H8N2 | 108.1 | 1302.9 | 601.847 | 1.51702 | [Burnt, Green, Iron Scorch, Must, Peanut Butter, Roasted, Rum, Wood](https://pubchem.ncbi.nlm.nih.gov/element/Iron" \o "https://pubchem.ncbi.nlm.nih.gov/element/Iron) |
| 52 | ( E,E) -2,4-nonadienal | C5910872 | C9H14O | 138.2 | 1201.7 | 392.277 | 1.34749 | / |
| 53 | 3-Methyl-3-buten-1-ol | C763326 | C5H10O | 86.1 | 1248.4 | 474.949 | 1.4278 | / |
| 54 | 2,4,5-trichloro-Phenol | C95954 | C6H3Cl3O | 197.4 | 1375 | 833.004 | 1.26466 | / |
| 55 | Thiocyanic acid methyl ester | C556649 | C2H3NS | 73.1 | 1275 | 532.195 | 1.18101 | / |
| 56 | 2,2,4,6,6-Pentamethylheptane | C13475826 | C12H26 | 170.3 | 994.5 | 197.76 | 1.32465 | / |
| 57 | 3-Methyl-2(5H)-furanone | C22122367 | C5H6O2 | 98.1 | 967.9 | 185.144 | 1.11544 | / |
| 58 | 1,3-Butanediol | C107880 | C4H10O2 | 90.1 | 808.5 | 137.761 | 1.13026 | / |
| 59 | 1,2-Dimethoxyethane | C110714 | C4H10O2 | 90.1 | 647.7 | 117.591 | 1.10234 | / |
| 60 | cyclohexane | C110827 | C6H12 | 84.2 | 674.2 | 119.832 | 1.13082 | / |

**Supplementary Table S2.** Relative content （μg/mL） of differential volatile metabolites (DVMs) in different treatment groups.

| **Index** | **Compounds** | **CK-0d** | **VAC-30d** | **IQFP-30d** | **VAC-120d** | **IQFP-120d** |
| --- | --- | --- | --- | --- | --- | --- |
| w28 | dihydro-2-methyl-3(2H)-furanone | 17.91734751 | 9.432722307 | 16.78590197 | 5.224617144 | 16.98937688 |
| KMW0054*176 | 1-hexen-3-one | 2.752021636 | 1.443995229 | 2.627594636 | 0.778220173 | 2.705093585 |
| XMW3408 | S-ethyl ethanethioate | 1.023379096 | 2.017916797 | 1.409324586 | 4.012912438 | 1.475349393 |
| KMW0451 | 4-methyl-5-thiazoleethanol | 0.213651958 | 0.068115944 | 0.10108642 | 0.086834136 | 0.085432426 |
| KMW0379 | 2-pentyl-Pyridine | 0.050517064 | 4.541722249 | 0.100474781 | 20.98256746 | 0.7204969 |
| KMW0068*177 | (Z)-3-Hexenal | 0.019768813 | 0.010479592 | 0.020379316 | 0.004828829 | 0.02089014 |
| KMW0170 | 1-octen-3-one | 0.013379047 | 0.007818964 | 0.011596125 | 0.005774276 | 0.013347586 |
| KMW0262 | 1-nonen-3-one | 0.012338705 | 0.009633431 | 0.010843576 | 0.014235153 | 0.010730166 |
| KMW0533*241 | 3-methyl-indole | 0.003656964 | 0.00966295 | 0.005863071 | 0.023377746 | 0.011378249 |
| QWMW0406 | 1,2-dithiane | 0.002530753 | 0.018895479 | 0.006423705 | 0.029070707 | 0.004625568 |
| QWMW0701 | 3-6-nonadien-1-yl-acetate | 0.002504496 | 0.175089481 | 0.061066957 | 0.428347488 | 0.032158692 |
| KMW0487*047 | 3-phenyl-2-propen-1-ol | 0.001105031 | 0.031886287 | 0.010866888 | 0.075834862 | 0.006112728 |
| KMW0482*049 | (E,E)-2,4-decadienal, | 0.001051678 | 0.072679441 | 0.024482033 | 0.174214666 | 0.012735859 |
| KMW0475*049 | (E,Z)-2,4-decadienal | 0.001051678 | 0.072679441 | 0.024482033 | 0.174214666 | 0.012735859 |
| KMW0407*260 | (E,E)-2,4-nonadienal | 0.000320631 | 0.06015505 | 0.010337056 | 0.140790186 | 0.010357742 |

**Supplementary Table S3.** Relative odor activity value (ROAV) of DVMs in different treatment groups.

| **Index** | **Compounds** | **CK-0d** | **VAC-30d** | **IQFP-30d** | **VAC-120d** | **IQFP-120d** |
| --- | --- | --- | --- | --- | --- | --- |
| KMW0482*049 | (E,E)-2,4-decadienal | 15.02396 | 1038.278 | 349.7433 | 2488.781 | 181.9408 |
| w28 | Dihydro-2-methyl-3(2H)-Furanone | 3583470 | 1886544 | 3357180 | 1044923 | 3397875 |
| XMW3408 | S-ethyl ethanethioate | 930.3446 | 1834.47 | 1281.204 | 3648.102 | 1341.227 |
| KMW0170 | 1-Octen-3-one | 2675.809 | 1563.793 | 2319.225 | 1154.855 | 2669.517 |
| QWMW0406 | 1,2-Dithiane | 1.265377 | 9.44774 | 3.211853 | 14.53535 | 2.312784 |
| QWMW0701 | 3-6-Nonadien-1-yl-acetate | 0.227681 | 15.91723 | 5.551542 | 38.94068 | 2.923517 |
| KMW0262 | 1-Nonen-3-one | 12338.71 | 9633.431 | 10843.58 | 14235.15 | 10730.17 |
| KMW0379 | 2-pentyl-pyridine | 84.19511 | 7569.537 | 167.458 | 34970.95 | 1200.828 |
| KMW0451 | 4-methyl-5-thiazoleethanol | 2.13652 | 0.681159 | 1.010864 | 0.868341 | 0.854324 |
| KMW0487*047 | 3-phenyl-2-propen-1-ol | 0.001105 | 0.031886 | 0.010867 | 0.075835 | 0.006113 |
| KMW0533*241 | 3-methyl-indole | 8.919424 | 23.56817 | 14.30017 | 57.01889 | 27.75183 |
| KMW0407*260 | (E,E)-2,4-nonadienal | 2.003942 | 375.9691 | 64.6066 | 879.9387 | 64.73589 |
| KMW0475*049 | (E,Z)-2,4-decadienal | 15.02396 | 1038.278 | 349.7433 | 2488.781 | 181.9408 |
| KMW0068*177 | (Z)-3-Hexenal | 4.942203 | 2.619898 | 5.094829 | 1.207207 | 5.222535 |
| KMW0054*176 | 1-Hexen-3-one | 137601.1 | 72199.76 | 131379.7 | 38911.01 | 135254.7 |

**Supplementary Table S4.** Relative content （mg/g） of sugar in different treatment groups.

| **Index** | **Compounds** | **CK-0d** | **VAC-30d** | **IQFP-30d** | **VAC-120d** | **IQFP-120d** |
| --- | --- | --- | --- | --- | --- | --- |
| Suc | Sucrose | 132.0165 | 101.0208 | 105.7180 | 43.6524 | 86.5545 |
| Glu | Glucose | 3.5755 | 19.7461 | 20.2900 | 38.0161 | 23.6676 |
| Fru | D-Fructose | 2.5188 | 8.9210 | 13.1256 | 23.9991 | 15.6529 |
| Mal | Maltose | 1.4740 | 1.4089 | 2.5803 | 2.0220 | 3.6833 |
| Sorbitol | D-Sorbitol | 1.1698 | 1.1183 | 1.2398 | 1.1539 | 1.0879 |
| Inositol | Inositol | 0.3067 | 0.3262 | 0.3878 | 0.3877 | 0.3533 |
| Gal | D-Galactose | 0.1225 | 0.1717 | 0.1877 | 0.1940 | 0.2142 |
| Lev | Levoglucosan | 0.0843 | 0.0747 | 0.0698 | 0.0622 | 0.0662 |
| Cel | Cellobiose | 0.0749 | 0.1045 | 0.1326 | 0.1601 | 0.1674 |
| Tre | Trehalose | 0.0669 | 0.0361 | 0.0553 | 0.0480 | 0.0480 |
| Man-6-pho | D-Mannose-6-phosphate sodium salt | 0.0569 | 0.0713 | 0.0394 | 0.0568 | 0.0158 |
| Man | D-Mannose | 0.0478 | 0.0716 | 0.0915 | 0.1329 | 0.0990 |
| Raffinose | Raffinose | 0.0362 | 0.0277 | 0.0304 | 0.0204 | 0.0197 |
| Ribose | D-Ribose | 0.0277 | 0.0384 | 0.0657 | 0.1190 | 0.0595 |
| Ribose-5-pho-Ba | Barium D-ribose-5-phosphate | 0.0234 | 0.0284 | 0.0206 | 0.0200 | 0.0059 |
| Glucuronic-A | D-Glucuronic acid | 0.0227 | 0.0218 | 0.0218 | 0.0239 | 0.0227 |
| D-Ara | D-Arabinose | 0.0201 | 0.0214 | 0.0312 | 0.0337 | 0.0404 |
| Arabinitol | D-Arabinitol | 0.0191 | 0.0186 | 0.0181 | 0.0205 | 0.0188 |
| Xylitol | Xylitol | 0.0123 | 0.0109 | 0.0115 | 0.0112 | 0.0123 |
| Gal-A | D-Galacturonic acid | 0.0117 | 0.0124 | 0.0110 | 0.0150 | 0.0118 |
| 2-Ace-2-Deo-D-Glucosamine | 2-Acetamido-2-deoxy-D-glucopyranose | 0.0103 | 0.0091 | 0.0119 | 0.0138 | 0.0155 |
| Xylose | D-Xylose | 0.0099 | 0.0162 | 0.0191 | 0.0337 | 0.0195 |
| Rha | L-Rhamnose | 0.0096 | 0.0092 | 0.0090 | 0.0094 | 0.0093 |
| Ribono-1-4-lactone | D-Ribono-1,4-lactone | 0.0092 | 0.0113 | 0.0100 | 0.0110 | 0.0111 |
| Phe | Phenylglucoside | 0.0077 | 0.0070 | 0.0087 | 0.0077 | 0.0089 |
| Xylulose | D-Xylulose | 0.0064 | 0.0082 | 0.0101 | 0.0095 | 0.0097 |
| 2-Deo-ribose | 2-Deoxy-D-ribose | 0.0057 | 0.0098 | 0.0076 | 0.0127 | 0.0086 |

**Supplementary Table S5.** Relative content （mg/g） of differential accumulation metabolites (DAMs) in different treatment groups.

| **Index** | **Compounds** | **CK-0d** | **VAC-30d** | **IQFP-30d** | **VAC-120d** | **IQFP-120d** |
| --- | --- | --- | --- | --- | --- | --- |
| NEG_q2 | 13-Hode | 420692.9657 | 550952.4866 | 6088609.646 | 2472938.304 | 11059104.63 |
| NEG_q24 | 2-Ketoglutaric Acid | 2332399.083 | 1510771.512 | 1874604.18 | 1876521.834 | 1793319.926 |
| NEG_q137 | Dl-Glyceric Acid | 254553.982 | 165382.6271 | 572122.8972 | 296189.4182 | 705742.1247 |
| NEG_q165 | Ferulic Acid | 22424795.36 | 9425624.87 | 17139029.91 | 27845624.11 | 6964683.512 |
| NEG_q194 | Hypoxanthine | 16880.16595 | 4703571.247 | 415242.8738 | 2537877.303 | 461433.9906 |
| NEG_q222 | L-Glutamic Acid | 122699976.8 | 101852896.8 | 87329163.37 | 79821787.65 | 98223186.97 |
| NEG_q226 | L-Ornithine | 5611090.591 | 74978707.31 | 10319079.66 | 58549243.47 | 6154304.648 |
| NEG_q244 | Methylmalonic Acid | 27312161.03 | 64822097.66 | 24158350.83 | 48388983.18 | 20406529.78 |
| NEG_q249 | Myristoleic Acid | 12179808.06 | 47231659.73 | 46905249.58 | 59477871.68 | 65950285.19 |
| NEG_q303 | Rubinaphthin A | 5464.549732 | 72311.49063 | 52950.15185 | 43261.02909 | 417762.8506 |
| NEG_q317 | Sinapinic Acid | 10925832.2 | 8560576.294 | 19945206.91 | 6594781.574 | 2790680.73 |
| NEG_q358 | Xanthine | 155574.0109 | 913427.3248 | 527463.3237 | 482365.3619 | 505005.8627 |
| POS_q56 | Adenosine 2',3'-Cyclic Phosphate | 1620667.708 | 12667898.37 | 11221739.17 | 2264681.391 | 5899113.233 |
| POS_q107 | D-(+)-Cellobiose | 8672138.36 | 4991780.412 | 6936777.063 | 3759433.86 | 6960521.913 |
| POS_q130 | D-(+)-Trehalose | 44676345 | 28365869.86 | 40450332.91 | 21821359.74 | 52232048.07 |
| POS_q157 | Guanosine 3',5'-Cyclic Monophosphate | 3554195.321 | 16303547.19 | 20058662.43 | 4299767.09 | 8518694.593 |
| POS_q182 | L-Arginine | 3319213.026 | 1042235.781 | 3219812.186 | 3033474.337 | 2984403.86 |
| POS_q185 | L-Citrulline | 367774.562 | 198278.9876 | 246704.7177 | 292705.7773 | 265335.186 |
| POS_q190 | L-Glutamine | 3372594.372 | 1773955.119 | 3299103.883 | 2112213.05 | 2285964.339 |
| POS_q256 | Phosphorylcholine | 2115637.039 | 5484622.194 | 2361030.208 | 3520298.711 | 1650683.896 |
| POS_q310 | Trans-Zeatin | 10.00229966 | 215646.1904 | 90609.08927 | 230150.7412 | 10.00229966 |
| POS_q311 | Trans-Zeatinriboside | 691011.5592 | 604106.7013 | 1201788.146 | 825717.7652 | 1100567.764 |
| POS_t115 | LysoPC 20-4 | 1601.624635 | 1684.331532 | 461.5387986 | 1729.0105 | 711.6381939 |
| POS_t176 | Cis-Zeatin-7-N-glucoside | 137.0622038 | 378.9811503 | 449.7699107 | 371.2366003 | 461.361319 |
| POS_t327 | PoSPE | 2075924.929 | 1342252.607 | 2613642.171 | 2578582.03 | 1531843.026 |
| NEG_q219 | L-Aspartic Acid | 28931179.22 | 12350006.89 | 16338620.94 | 14651508.19 | 18122981.14 |
| POS_q55 | Adenosine | 37874156.59 | 34789284.77 | 60134983.68 | 48623442.22 | 57118595.32 |

**Supplementary Table S6. Sensory evaluation criteria for** VPSC

| **Score** | **Color (15%)** | **Aroma (25%)** | **Texture (20%)** | **Freshness (25%)** | **Overall acceptability (15%)** |
| --- | --- | --- | --- | --- | --- |
| 1–3 | Pale or whitish | Rancid off-odor | Severely collapsed kernels, very poor elasticity | Severe browning or mold | Unacceptable |
| 4–7 | Uniform light yellow with slight gloss | Weak aroma | Slight kernel collapse, soft texture | Slight browning or mold | Acceptable |
| 8–10 | Uniformly cooked yellow color, with a shiny surface | Fresh, sweet aroma | Plump, tender kernels with good elasticity | No browning or mold | Highly acceptable |
